# Supplementary material for: Heritability and Associations among Grain Yield and Quality Traits in Quality Protein Maize (QPM) and Non-QPM Hybrids
Source: MDPI journal article supplement (doi:10.3390/plants11060713), 2022-03-08
Supplement: s1 [file s1]

**Supplementary Table S1.** Site, weather and soil descriptions for the test locations in South Africa and Zimbabwe

| Location name  | Country      | Latitude  | Longitude | Elevation<br>above sea<br>level (m) | Total<br>rainfall<br>(mm) | Mean Temperature<br>ranges (°C) |         | soil parameter          |                          |                          |         |
|----------------|--------------|-----------|-----------|-------------------------------------|---------------------------|---------------------------------|---------|-------------------------|--------------------------|--------------------------|---------|
|                |              |           |           |                                     |                           | Minimum                         | Maximum | N (g kg <sup>-1</sup> ) | P (mg kg <sup>-1</sup> ) | K (mg kg <sup>-1</sup> ) | Soil pH |
| Harare         | Zimbabwe     | -17°46'S  | 31°02'E   | 1406                                | 820                       | 5.5                             | 23.8    | 0.5                     | 18.13                    | 0.6                      | 5.8     |
| Gwebi          | Zimbabwe     | -17°13'S  | 31°E'     | 1406                                | 637                       | 4.9                             | 26.2    | 0.4                     | 14.5                     | 1.3                      | 6       |
| Bindura        | Zimbabwe     | -17 °18'S | 31° 02'E  | 1480                                | 976                       | 4.8                             | 27.8    | 0.3                     | 19.3                     | 2.4                      | 6       |
| Harare-misting | Zimbabwe     | -17°46'S  | 31°02'E   | 1406                                | 820                       | 5.5                             | 23.8    | 0.8                     | 22.36                    | 1.3                      | 5.8     |
| Rattrey-Arnold | Zimbabwe     | -17° 67'S | 31° 17'E  | 1462                                | 865                       | 5.3                             | 23.6    | 0.7                     | 17.2                     | 3.1                      | 6       |
| Glandel        | Zimbabwe     | -17°31'S  | 31°3'E    | 1147                                | 669                       | 7.4                             | 28.1    | 0.5                     | 11.4                     | 2.2                      | 6       |
| Lionsdel       | Zimbabwe     | -17°25'S  | 30°02'E   | 1232                                | 620                       | 6.1                             | 29      | 0.4                     | 15.7                     | 1.7                      | 6       |
| Cedara 2018    | South Africa | -29°54'S  | 30°26'E   | 1066                                | 807                       | 9.4                             | 27.1    | 0.7                     | 11.3                     | 77.9                     | 5.6     |
| PotchTB8-18    | South Africa | -26°73'S  | 27°08'E   | 1349                                | 544                       | 13.4                            | 28.6    | 0.3                     | 27.2                     | 278.4                    | 6.4     |
| PotchR8-18     | South Africa | -26°73'S  | 27°06'E   | 1349                                | 544                       | 13.4                            | 28.6    | 0.5                     | 16.6                     | 278.4                    | 6.1     |
| Potch 2019     | South Africa | -26°74'S  | 27°08'E   | 1349                                | 539                       | 11.6                            | 27.8    | 0.4                     | 27.1                     | 280.6                    | 6.4     |
| Cedara 2019    | South Africa | -29°71'S  | 30°26'E   | 1066                                | 559                       | 8.5                             | 25.9    | 0.6                     | 10.9                     | 81.3                     | 5.9     |
